# Supplementary material for: Hypolipidemic Roles of Casein-Derived Peptides by Regulation of Trans-Intestinal Cholesterol Excretion and Bile Acid Synthesis
Source: PubMed Central journal article supplement (PMC7600240; doi:10.3390/nu12103058), 2020-10-06
Supplement: nutrients-12-03058-s001.pdf [file nutrients-12-03058-s001.pdf]

## Supplementary file

**Table 1.** Primers used for qRT-PCR to assess gene expression alterations.

| Gene Name           | Forward Primer                      | Reverse Primer                     |
|---------------------|-------------------------------------|------------------------------------|
| <i>Human ABCG5</i>  | 5'-AGCAAGGAACGGGAAATAGA-3'          | 5'-CAGGAGAACACCCAGTTTAGAG-3'       |
| <i>Human ABCG8</i>  | 5'- GATACAGCCGCCCTCTTT-3'           | 5'-GCCCCGTCTTCCAGTTCATAG-3'        |
| <i>Human FGF19</i>  | 5'-AGATCAAGGCAGTCGCTCTG-3'          | 5'-AAAGCACAGTCTTCCTCCGA-3'         |
| <i>Human FXR</i>    | 5'-<br>AAAGTTGTGTAAGATTCACCAGCCT-3' | 5'-GGTCGTTTACTCTCCATGACATCA-<br>3' |
| <i>Human CYP7A1</i> | 5'-GAC CAC ATC TTT GAT TTG G-3'     | 5'-CCGTTTGCCTTCTCCTAA-3'           |
| <i>Human CYP8B</i>  | 5'-GCCTGTCCTTTGTAATGCTGA-3'         | 5'-GAAGCGAAAGAGGCTGTCC-3'          |
| <i>Human GAPDH</i>  | 5'-ATGACATCAAGAAGGTGGTG-3'          | 5'-CATAACCAGGAAATGAGCTTG-3'        |
|                     | 5'-CTTCGACAAAATTGCCATCC-3'          | 5'-GAAAGGAACCGTGGGTAAGG-3'         |
| <i>Mouse Abcg5</i>  | 5'- TGGTCAGTCCAACACTCTGG -3'        | 5'-ACTGGGTTGCCCATTTATCC-3'         |
| <i>Mouse Abcg8</i>  | 5'-GAGGACCAAACGAACGAAATT-3'         | 5'-ACGTCCTTGATGGCAATCG-3'          |
| <i>Mouse Fgf15</i>  | 5'-AAATGAGGGCTGCAAAGGTTTCT-3'       | 5'-TGCCCCCGTTCTTACACTTG-3'         |
| <i>Mouse Fxr</i>    | 5'-TACAGAGTGCTGGCCAAGAG-3'          | 5'-GCTGTCCGGATATTCAAGGA-3'         |
| <i>Mouse Cyp7a1</i> | 5'-CCTCTGGACAAGGGTTTTGTG-3'         | 5'-GCACCGTGAAGACATCCCC-3'          |
| <i>Mouse Cyp8b1</i> | 5'-                                 | 5'-                                |
| <i>Mouse Gapdh</i>  | CGACTTCAACAGCAACTCCCCTCTTCC<br>-3'  | TGGGTGGTCCAGGGTTTCTTACTCCTT-<br>3' |
